# Supplementary material for: Allosteric cross-talk in chromatin can mediate drug-drug synergy
Source: PubMed Central journal article supplement (PMC5379107; doi:10.1038/ncomms14860), 2017-03-30
Supplement: ncomms14860-s1.pdf [file ncomms14860-s1.pdf]

**Supplementary Table 1.** Data collection and refinement statistics for NCP treated with RAPTA-T

| <b>RAPTA-T-NCP</b>                                      |                                               |
|---------------------------------------------------------|-----------------------------------------------|
| <b>Data collection*</b>                                 |                                               |
| Space group                                             | P2 <sub>1</sub> 2 <sub>1</sub> 2 <sub>1</sub> |
| Cell dimensions                                         |                                               |
| <i>a</i> (Å)                                            | 106.68                                        |
| <i>b</i> (Å)                                            | 109.82                                        |
| <i>c</i> (Å)                                            | 182.34                                        |
| Resolution (Å)                                          | 2.81–60.8<br>(2.81–2.96)                      |
| <i>R</i> <sub>merge</sub> (%)                           | 5.9 (50.1)                                    |
| <i>I</i> / $\sigma I$                                   | 15.5 (2.3)                                    |
| Completeness (%)                                        | 96.2 (78.2)                                   |
| Redundancy                                              | 6.6 (4.3)                                     |
| <b>Refinement</b>                                       |                                               |
| Resolution (Å)                                          | 2.81–60.8                                     |
| No. reflections                                         | 49,694                                        |
| <i>R</i> <sub>work</sub> / <i>R</i> <sub>free</sub> (%) | 20.8 / 24.1                                   |
| No. atoms                                               | 12,077                                        |
| Protein                                                 | 6,086                                         |
| DNA                                                     | 5,939                                         |
| Solvent                                                 | 16                                            |
| Adduct                                                  | 36                                            |
| <i>B</i> -factors (Å <sup>2</sup> )                     | 101                                           |
| Protein                                                 | 72                                            |
| DNA                                                     | 130                                           |
| Solvent                                                 | 120                                           |
| Adduct                                                  | 177                                           |
| R.m.s. deviations                                       |                                               |
| Bond lengths (Å)                                        | 0.010                                         |
| Bond angles (°)                                         | 1.50                                          |

Single crystal data, from a 20 hour-incubation with 0.25 mM RAPTA-T.  
Values in parentheses are for the highest-resolution shell.

**Supplementary Table 2.** RAPTA-T and auranofin binding sites in crystals of the NCP

| Agent Treatment (mM, h)                              |     |          | Resolution<br>(Å) | Anomalous Peak ( $\sigma$ ) |     |      |      |
|------------------------------------------------------|-----|----------|-------------------|-----------------------------|-----|------|------|
| RAPTA-T                                              | AUF | Duration |                   | RU1                         | RU2 | AU1  | AU1' |
| <i>Data collected at <math>\lambda=1.04</math> Å</i> |     |          |                   |                             |     |      |      |
| 0                                                    | 1   | 24       | 2.50              |                             |     |      |      |
| 0                                                    | 1   | 68       | 2.50              |                             |     |      |      |
| 0                                                    | 1   | 92       | 2.38              |                             |     |      |      |
| 0.5                                                  | 2   | 17       | 2.38              | 3.0                         | 3.5 | 15.8 | 17.8 |
| 0.5                                                  | 2   | 43       | 2.60              | 2.3                         | 3.0 | 13.4 | 14.5 |
| 0.5-1*                                               | 2   | 40       | 2.87              | 3.2                         | 3.2 | 19.6 | 17.9 |
| 0.5-1*                                               | 2   | 40       | 2.88              | 3.6                         | 4.7 | 24.5 | 25.3 |
| <i>Data collected at <math>\lambda=1.50</math> Å</i> |     |          |                   |                             |     |      |      |
| 0.5                                                  | 2   | 16       | 2.50              | 3.8                         | 3.7 | 14.6 | 13.7 |
| 0.5                                                  | 2   | 43       | 2.75              | 3.3                         | 3.2 | 7.5  | 8.4  |
| 0.5-1*                                               | 2   | 40       | 2.80              | 6.7                         | 4.3 | 23.1 | 22.3 |

Peak heights are based on anomalous difference electron density maps

\* 22 h incubation at 0.5 mM, followed by 18 h incubation at 1 mM

**Supplementary Table 3.** Data collection and refinement statistics for NCP treated with RAPTA-T and auranofin

| <b>RAPTA-T/AUF-NCP</b>                                  |                                               |
|---------------------------------------------------------|-----------------------------------------------|
| <b>Data collection*</b>                                 |                                               |
| Space group                                             | P2 <sub>1</sub> 2 <sub>1</sub> 2 <sub>1</sub> |
| Cell dimensions                                         |                                               |
| <i>a</i> (Å)                                            | 106.73                                        |
| <i>b</i> (Å)                                            | 109.95                                        |
| <i>c</i> (Å)                                            | 182.04                                        |
| Resolution (Å)                                          | 2.80–48.9<br>(2.80–2.95)                      |
| <i>R</i> <sub>merge</sub> (%)                           | 3.7 (43.3)                                    |
| <i>I</i> / $\sigma I$                                   | 23.2 (1.6)                                    |
| Completeness (%)                                        | 95.8 (76.6)                                   |
| Redundancy                                              | 5.0 (2.0)                                     |
| <b>Refinement</b>                                       |                                               |
| Resolution (Å)                                          | 2.80–48.9                                     |
| No. reflections                                         | 48,472                                        |
| <i>R</i> <sub>work</sub> / <i>R</i> <sub>free</sub> (%) | 21.5 / 23.6                                   |
| No. atoms                                               | 12,093                                        |
| Protein                                                 | 6,086                                         |
| DNA                                                     | 5,939                                         |
| Solvent                                                 | 16                                            |
| Adduct                                                  | 52                                            |
| <i>B</i> -factors (Å <sup>2</sup> )                     | 101                                           |
| Protein                                                 | 70                                            |
| DNA                                                     | 132                                           |
| Solvent                                                 | 121                                           |
| Adduct                                                  | 145                                           |
| R.m.s. deviations                                       |                                               |
| Bond lengths (Å)                                        | 0.007                                         |
| Bond angles (°)                                         | 1.46                                          |

Single crystal data, from a 40 hour-incubation with 2 mM Auranofin and 0.5-1.0 mM RAPTA-T (22 hours at 0.5 mM and 18 hours at 1.0 mM).

Values in parentheses are for the highest-resolution shell.

**Supplementary Table 4.** Statistical occurrence (expressed as % of the total simulation time) of close contacts between AUF and the histone protein residues during MD of the RAPTA-T/AUF–NCP system. Data are calculated during the last ~200 ns of MD, as well as over the entire length of the production runs (i.e., 600 ns), with the associated average and standard deviation. Hydrophobic contacts were counted for nonpolar atoms separated by at most 4.0 Å<sup>1</sup>. Data are reported for the front and rear of the NCP.

| RAPTA-T/AUF-NCP |                  |           |         |       |             |           |         |       |
|-----------------|------------------|-----------|---------|-------|-------------|-----------|---------|-------|
|                 | FRONT            |           |         |       | REAR        |           |         |       |
| Histone H3'     | Last 200 ns      | Prod. run | Average | Stdev | Last 200 ns | Prod. run | Average | Stdev |
| A135            | 20.2             | 18.9      | 19.6    | 0.9   | 30.7        | 29.7      | 30.2    | 0.7   |
| R134            | 60.4             | 63.4      | 61.9    | 2.1   | 73.9        | 74.5      | 74.2    | 0.4   |
| E133            | 32.5             | 30.4      | 31.4    | 1.5   | 38.7        | 36.4      | 37.5    | 1.6   |
| G132            | 7.7              | 6.7       | 7.2     | 0.7   | 9.3         | 10.3      | 9.8     | 0.7   |
| R131            | 59.0             | 60.1      | 59.5    | 0.8   | 71.0        | 70.4      | 70.7    | 0.4   |
| I130            | 60.5             | 59.7      | 60.1    | 0.6   | 60.0        | 55.6      | 57.8    | 3.1   |
| R129            | 74.5             | 69.8      | 72.1    | 3.3   | 74.1        | 72.3      | 73.2    | 1.2   |
| R128            | 73.1             | 76.6      | 74.9    | 2.5   | 73.2        | 70.3      | 71.7    | 2.0   |
| A127            | 20.0             | 18.6      | 19.3    | 1.0   | 20.0        | 22.4      | 21.2    | 1.7   |
| L126            | 84.0             | 86.4      | 85.2    | 1.7   | 83.5        | 84.6      | 84.1    | 0.7   |
| E125            | 51.5             | 48.5      | 50.0    | 2.1   | 50.0        | 52.6      | 51.3    | 1.8   |
| I124            | 60.5             | 62.2      | 61.4    | 1.2   | 57.2        | 58.8      | 58.0    | 1.1   |
| D123            | 36.0             | 39.4      | 37.7    | 2.4   | 33.2        | 31.7      | 32.5    | 1.1   |
| K122            | 85.3             | 85.3      | 85.3    | 0.0   | 80.2        | 79.6      | 79.9    | 0.4   |
|                 |                  |           |         |       |             |           |         |       |
| Histone H3      | last.200         | prod.     | average | stdev | last.200    | prod.     | average | stdev |
| A102            | 20.1             | 19.6      | 19.8    | 0.3   | 20.1        | 19.2      | 19.6    | 0.6   |
| L103            | 60.0             | 62.3      | 61.1    | 1.6   | 60.0        | 62.4      | 61.2    | 1.7   |
| F104            | 55.3             | 56.4      | 55.8    | 0.8   | 55.3        | 53.3      | 54.3    | 1.4   |
| E105            | 38.0             | 36.7      | 37.4    | 0.9   | 38.0        | 36.6      | 37.3    | 1.0   |
| D106            | 27.3             | 25.4      | 26.3    | 1.3   | 27.3        | 26.4      | 26.9    | 0.7   |
| T107            | 36.7             | 34.6      | 35.7    | 1.5   | 36.7        | 32.6      | 34.7    | 2.9   |
| N108            | 33.9             | 35.6      | 34.7    | 1.2   | 33.7        | 30.4      | 32.0    | 2.3   |
| L109            | 74.3             | 72.3      | 73.3    | 1.4   | 74.1        | 76.5      | 75.3    | 1.7   |
| C110            | 30.8             | 28.7      | 29.7    | 1.5   | 30.7        | 31.5      | 31.1    | 0.6   |
| A111            | 23.0             | 21.4      | 22.2    | 1.2   | 23.0        | 22.5      | 22.8    | 0.4   |
| I112            | 82.7             | 80.2      | 81.5    | 1.8   | 81.8        | 78.4      | 80.1    | 2.4   |
| H113            | Covalently bound |           |         |       |             |           |         |       |
| A114            | 33.3             | 31.4      | 32.4    | 1.4   | 33.3        | 30.1      | 31.7    | 2.3   |
| K115            | 69.1             | 65.3      | 67.2    | 2.7   | 69.0        | 68.7      | 68.8    | 0.2   |

**Supplementary Table 5.** Statistical occurrence (expressed as % of the total simulation time) of close contacts between AUF and the histone protein residues during MD of the AUF–NCP system. Data are calculated during the last ~200 ns of MD, as well as over the entire length of the production runs (i.e., 600 ns), with the associated average and standard deviation. Hydrophobic contacts were counted for nonpolar atoms separated by at most 4.0 Å<sup>1</sup>. Data are reported for the front and rear of the NCP.

| AUF-NCP     |                  |           |         |       |             |           |         |       |
|-------------|------------------|-----------|---------|-------|-------------|-----------|---------|-------|
|             | FRONT            |           |         |       | REAR        |           |         |       |
| Histone H3' | Last 200 ns      | Prod. run | Average | Stdev | Last 200 ns | Prod. run | Average | Stdev |
| A135        | 34.4             | 32.1      | 33.2    | 1.6   | 30.0        | 32.5      | 31.3    | 1.8   |
| R134        | 73.1             | 71.3      | 72.2    | 1.3   | 61.4        | 63.4      | 62.4    | 1.4   |
| E133        | 38.3             | 40.2      | 39.3    | 1.3   | 32.2        | 28.6      | 30.4    | 2.6   |
| G132        | 9.3              | 10.3      | 9.8     | 0.7   | 7.7         | 9.8       | 8.8     | 1.5   |
| R131        | 71.9             | 75.2      | 73.5    | 2.3   | 59.0        | 56.7      | 57.9    | 1.6   |
| I130        | 50.1             | 48.2      | 49.1    | 1.3   | 50.1        | 50.1      | 50.1    | 0.0   |
| R129        | 62.3             | 59.2      | 60.7    | 2.2   | 61.8        | 61.8      | 61.8    | 0.0   |
| R128        | 60.5             | 60.2      | 60.4    | 0.2   | 60.0        | 60.0      | 60.0    | 0.0   |
| A127        | 16.6             | 12.5      | 14.5    | 2.9   | 16.6        | 16.6      | 16.6    | 0.0   |
| L126        | 69.3             | 70.2      | 69.8    | 0.6   | 69.6        | 69.5      | 69.5    | 0.1   |
| E125        | 42.8             | 41.9      | 42.4    | 0.7   | 43.9        | 42.4      | 43.2    | 1.1   |
| I124        | 50.2             | 48.8      | 49.5    | 1.0   | 49.8        | 45.6      | 47.7    | 3.0   |
| D123        | 29.7             | 32.4      | 31.1    | 1.9   | 29.7        | 23.4      | 26.6    | 4.5   |
| K122        | 69.8             | 64.2      | 67.0    | 3.9   | 70.1        | 64.6      | 67.4    | 3.9   |
|             |                  |           |         |       |             |           |         |       |
| Histone H3  | last.200         | prod.     | average | stdev | last.200    | prod.     | average | stdev |
| A102        | 16.6             | 17.8      | 17.2    | 0.8   | 16.6        | 18.6      | 17.6    | 1.4   |
| L103        | 49.7             | 46.4      | 48.1    | 2.4   | 49.8        | 46.3      | 48.0    | 2.5   |
| F104        | 46.1             | 42.9      | 44.5    | 2.3   | 46.0        | 48.9      | 47.5    | 2.0   |
| E105        | 31.6             | 28.7      | 30.1    | 2.0   | 31.6        | 32.3      | 31.9    | 0.5   |
| D106        | 22.6             | 23.3      | 23.0    | 0.5   | 22.6        | 22.3      | 22.5    | 0.2   |
| T107        | 30.5             | 27.8      | 29.1    | 1.9   | 30.4        | 32.4      | 31.4    | 1.4   |
| N108        | 28.0             | 28.9      | 28.4    | 0.6   | 28.0        | 23.4      | 25.7    | 3.2   |
| L109        | 62.1             | 60.3      | 61.2    | 1.3   | 62.0        | 62.3      | 62.1    | 0.2   |
| C110        | 25.5             | 23.2      | 24.3    | 1.6   | 25.4        | 23.4      | 24.4    | 1.4   |
| A111        | 19.2             | 22.1      | 20.7    | 2.1   | 19.1        | 18.9      | 19.0    | 0.2   |
| I112        | 68.4             | 64.3      | 66.4    | 2.9   | 67.8        | 69.7      | 68.7    | 1.3   |
| H113        | Covalently bound |           |         |       |             |           |         |       |
| A114        | 27.6             | 25.8      | 26.7    | 1.3   | 27.7        | 29.7      | 28.7    | 1.4   |
| K115        | 57.2             | 55.4      | 56.3    | 1.3   | 57.4        | 56.5      | 57.0    | 0.7   |

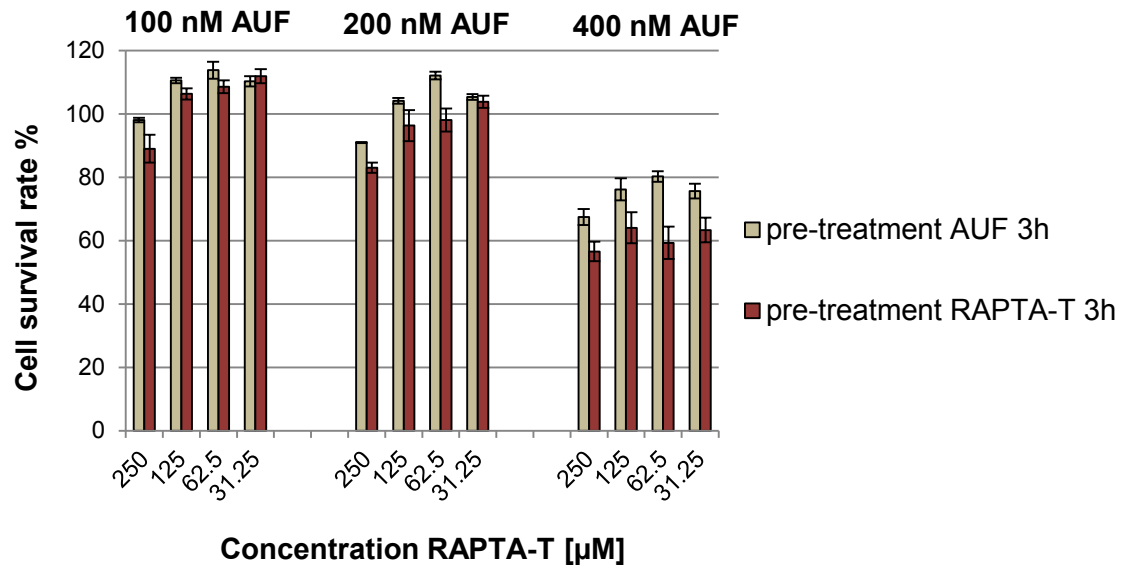

**Supplementary Figure 1.** Pre-treatment with RAPTA-T sensitizes ovarian cancer cells towards AUF. A2780 ovarian cancer cells were pre-incubated with different doses of either RAPTA-T or AUF for 3h before incubating the cells with the respective other drug for a further 48h (mean±s.d.,  $n=3$ ).

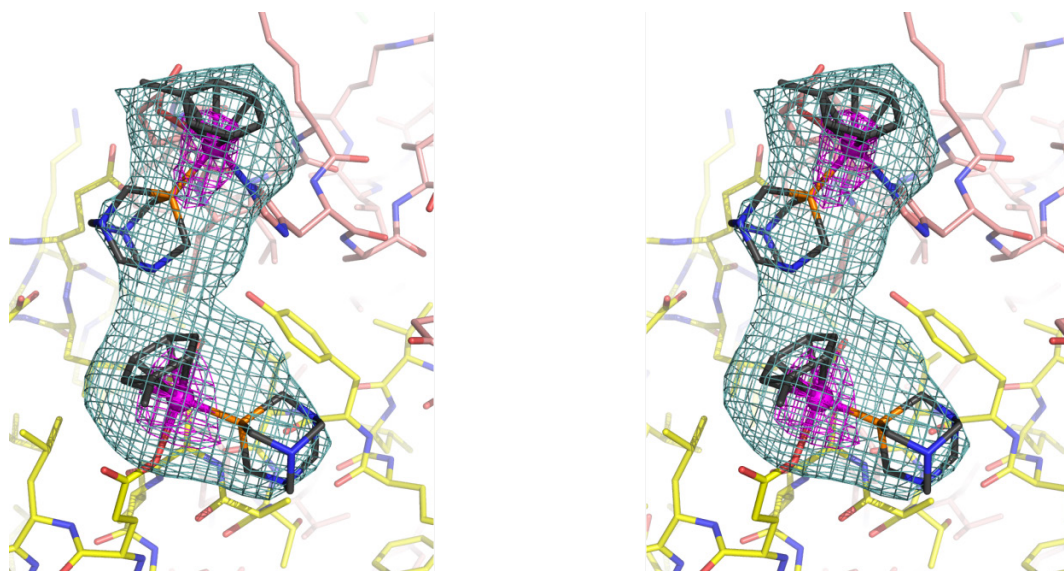

**Supplementary Figure 2.** Experimental electron density corresponding to the RAPTA-T adducts in the X-ray crystal structure of RAPTA-T-NCP, in stereo view. An  $F_O-F_C$  omit electron density map (teal; contoured at  $2.5\sigma$ ; RAPTA-T atoms omitted from the model) and an anomalous difference electron density map (magenta; contoured at  $4.5\sigma$ ) are superimposed onto the refined model. RAPTA-T sites RU1 and RU2 are at bottom and top, respectively.

**a**

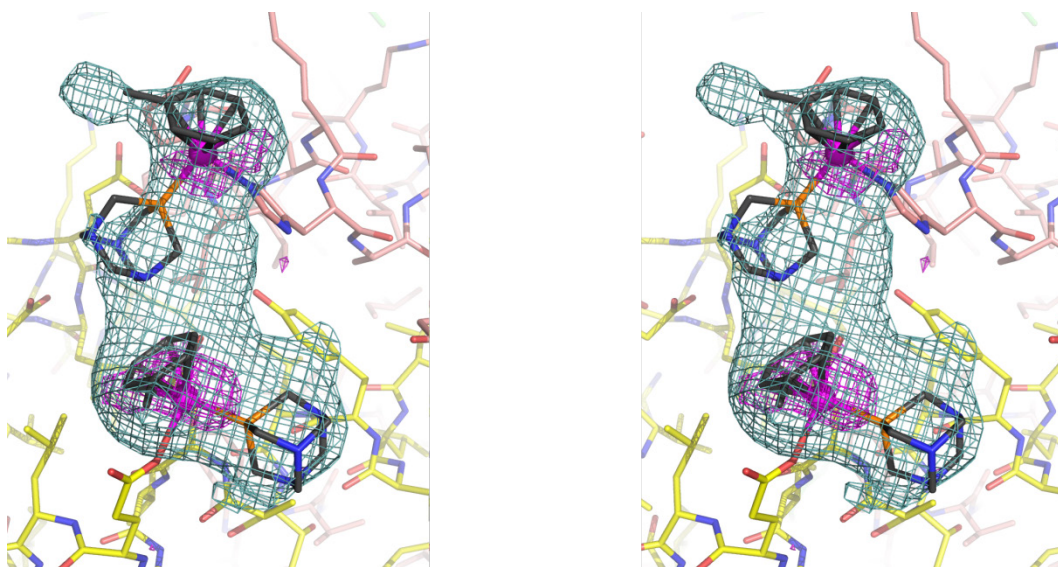

**b**

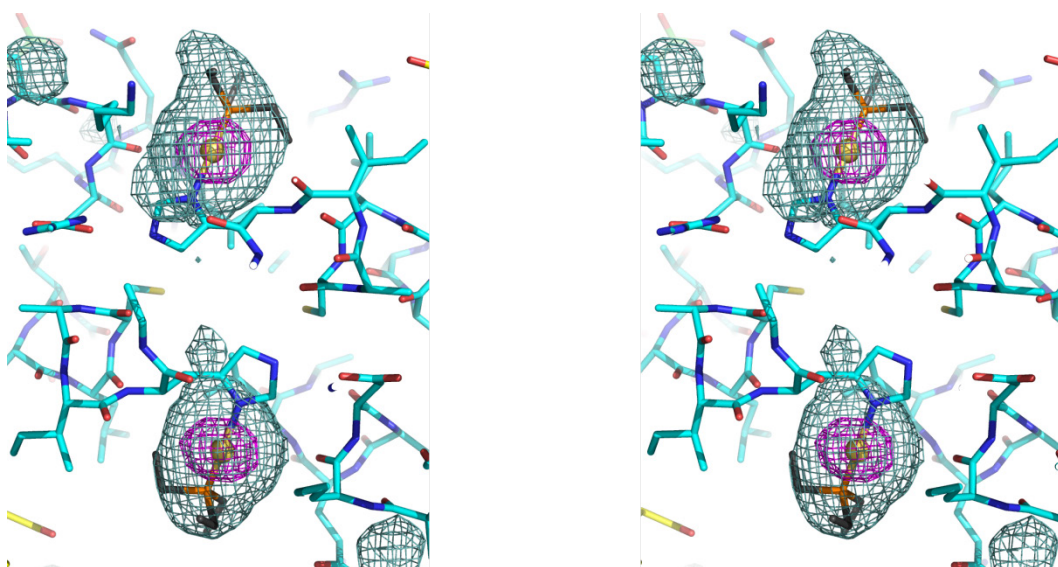

**Supplementary Figure 3.** Experimental electron density corresponding to the RAPTA-T and AUF adducts in the X-ray crystal structure of RAPTA-T/AUF-NCP, in



stereo view. **(a,b)** An  $F_O - F_C$  omit electron density map (teal; contoured at  $2.5\sigma$  [a,b]; RAPTA-T and AUF atoms omitted from the model) and an anomalous difference electron density map (magenta; contoured at  $3.2\sigma$  [a] and  $11\sigma$  [b]) are superimposed onto the refined model. **(a)** RAPTA-T sites RU1 and RU2 are at bottom and top, respectively. **(b)** AUF sites AU1 and AU1' are at top and bottom, respectively.

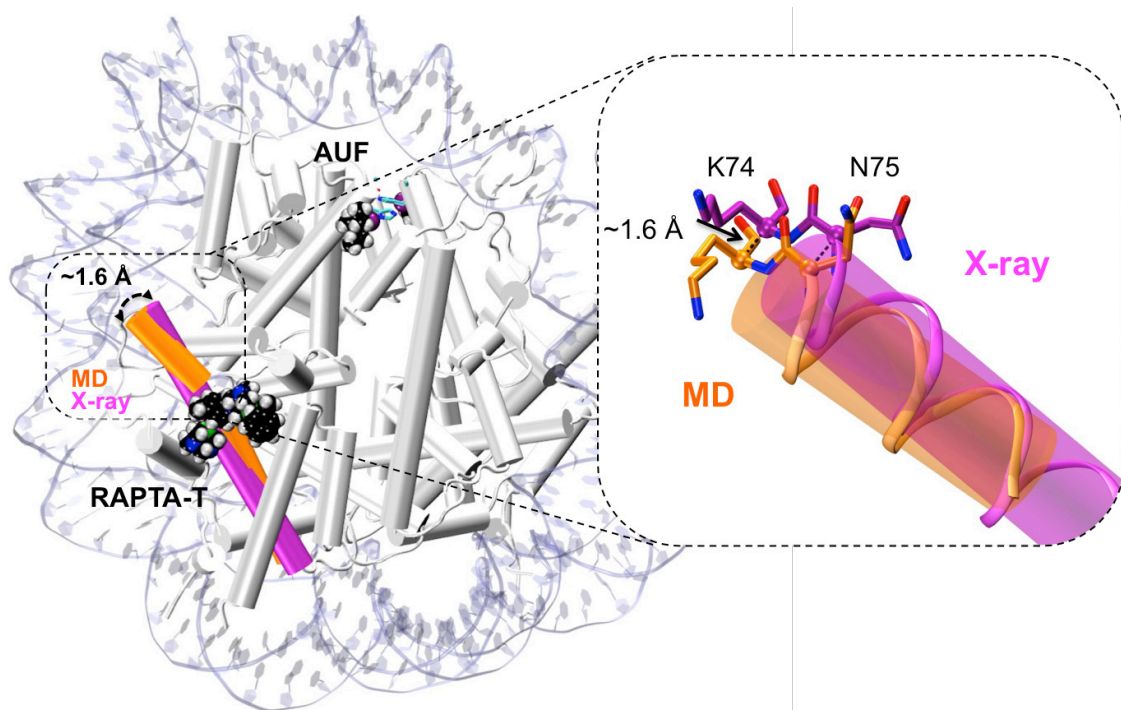

**Supplementary Figure 4.** X-ray structure of the RAPTA-T/AUF–NCP complex superposed with a selected MD frame of the system. The long  $\alpha$ -helix of the H2A histone is shown in magenta (X-ray structure) and orange (MD frame), highlighting the kink induced by the presence of RAPTA-T adducts. This kinking occurs during the early stages of the MD simulation (i.e., during the equilibration phase) and results in a shift of  $\sim 1.6$  Å of the end of the  $\alpha$ -helix (calculated by measuring the distance between the C $\alpha$  atoms of the K74 and N75 residues) of the H2A histone with respect to the X-ray structure. A close view is shown on the right.

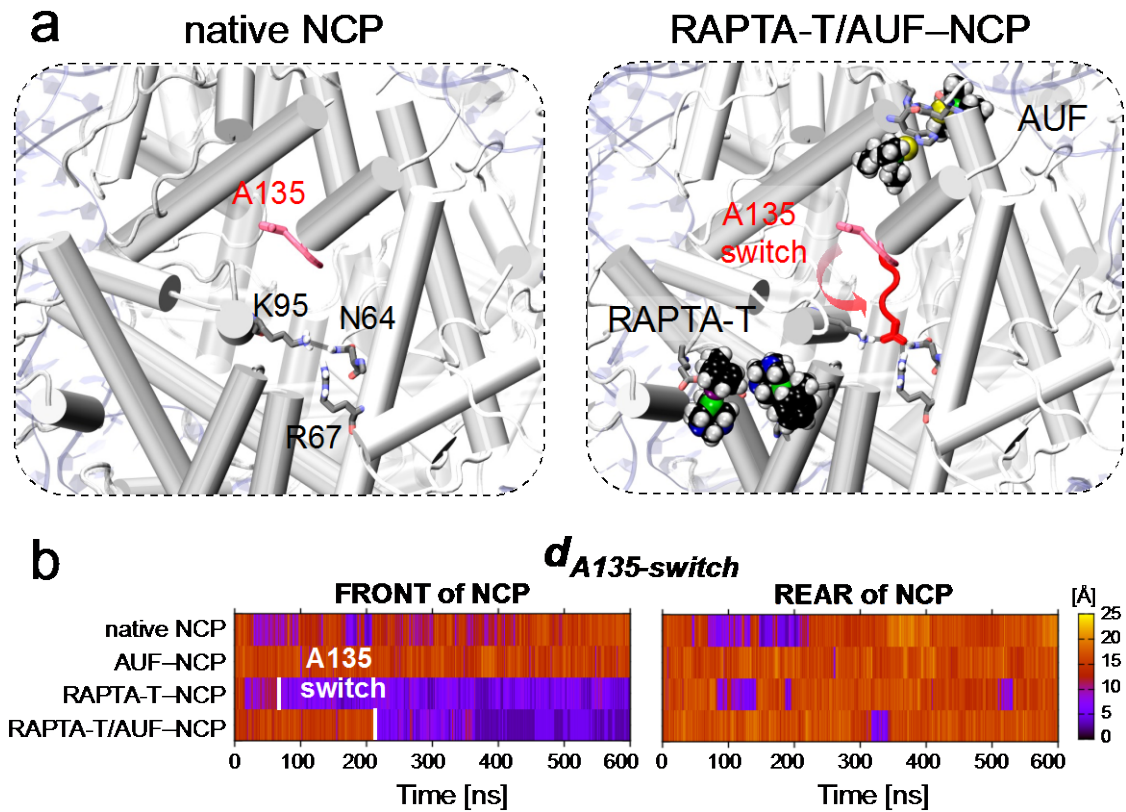

**Supplementary Figure 5.** (a) Snapshots from MD simulations of the NCP (left panel) and the RAPTA-T/AUF-NCP (right panel) systems, showing the conformational switch of the H3 C-terminal residue A135 occurring in the presence of RAPTA-T adducts (right). The protein histones are shown as cartoon, the DNA is represented as ribbons. RAPTA-T and AUF (black) are shown in a space-filling representation. In the right panel, an arrow indicates the conformational switch of A135, which is shown as sticks in both its initial (pink) and final (red) configurations. The H2A K95, H4 N64 and H4 R67 residues, which H-bond with A135 after its conformational switch are also shown. (b) Time evolution of the  $d_{A135\text{-switch}}$  distance at the front (left) and rear (right) of the NCP, AUF-NCP, RAPTA-T-NCP and RAPTA-T/AUF-NCP systems, color-coded according to the scale on the right. The  $d_{A135\text{-switch}}$  distance is defined as the distance between the C $\alpha$  atom of H3 A135 and the center of mass (COM) of the H4 N64 and R67 residues.

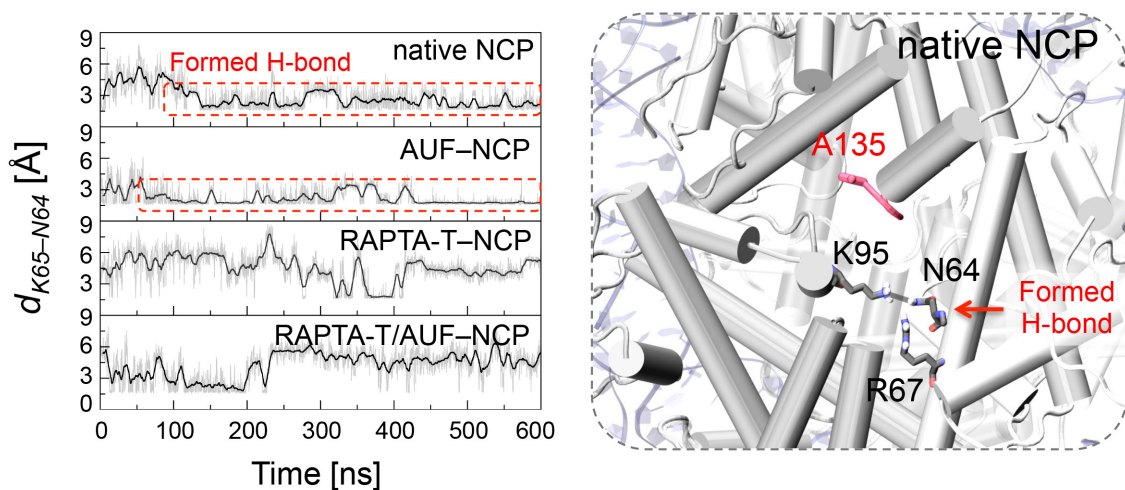

**Supplementary Figure 6.** Time evolution of the donor–acceptor H-bond distance between the H2A K95 and H4 N64 residues ( $d_{K95-N64}$ ), reported for the NCP, AUF–NCP, RAPTA–T–NCP and RAPTA–T/AUF–NCP systems. A red box highlights the formed H-bond in the absence of RAPTA–T adducts (NCP and AUF–NCP). The box on the right shows the formed K95–N64 H-bond within the NCP. The protein histones are shown as cartoon, the DNA is represented as ribbons. H3 A135 (red) and the H2A K95, H4 N64 and H4 R67 (black) residues are shown as sticks.

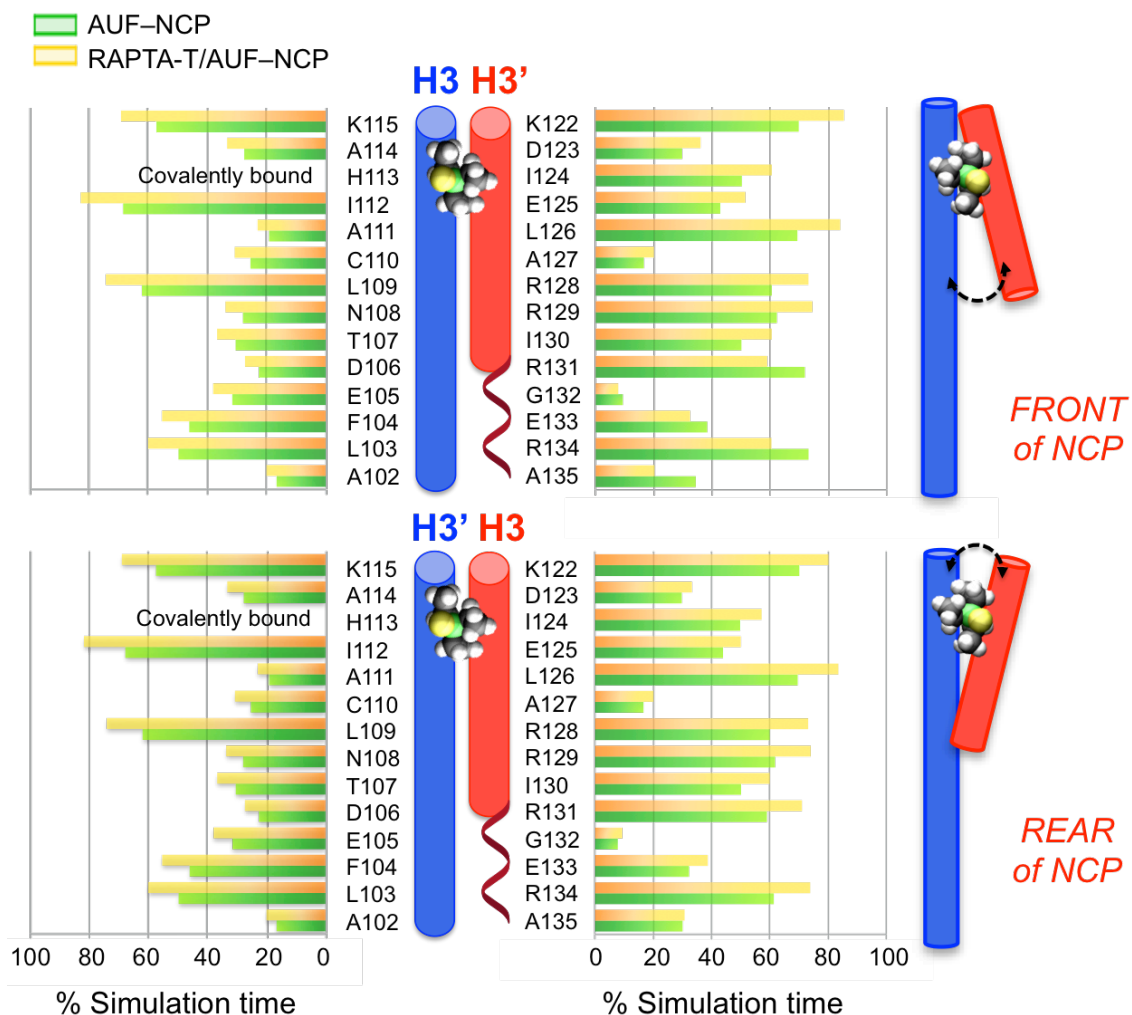

**Supplementary Figure 7.** Statistical occurrence (expressed as % of the total simulation time) of close contacts between AUF and the histone protein residues during the last ~200 ns of MD of the AUF-NCP (green bars) and RAPTA-T/AUF-NCP (yellow bars) systems. Hydrophobic contacts were counted for nonpolar atoms separated by at most 4.0 Å<sup>1</sup>. Data are reported for the front (top) and rear (bottom) of the systems. A schematic cartoon representation of the H3/H3' interfaces, allocating AUF at the front and rear of the NCP structure, is also shown. The average difference in statistical occurrence for the close contacts between the two systems is 8.6 ± 1.4%. Full data including standard deviation is given in Supplementary Tables 4 and 5.

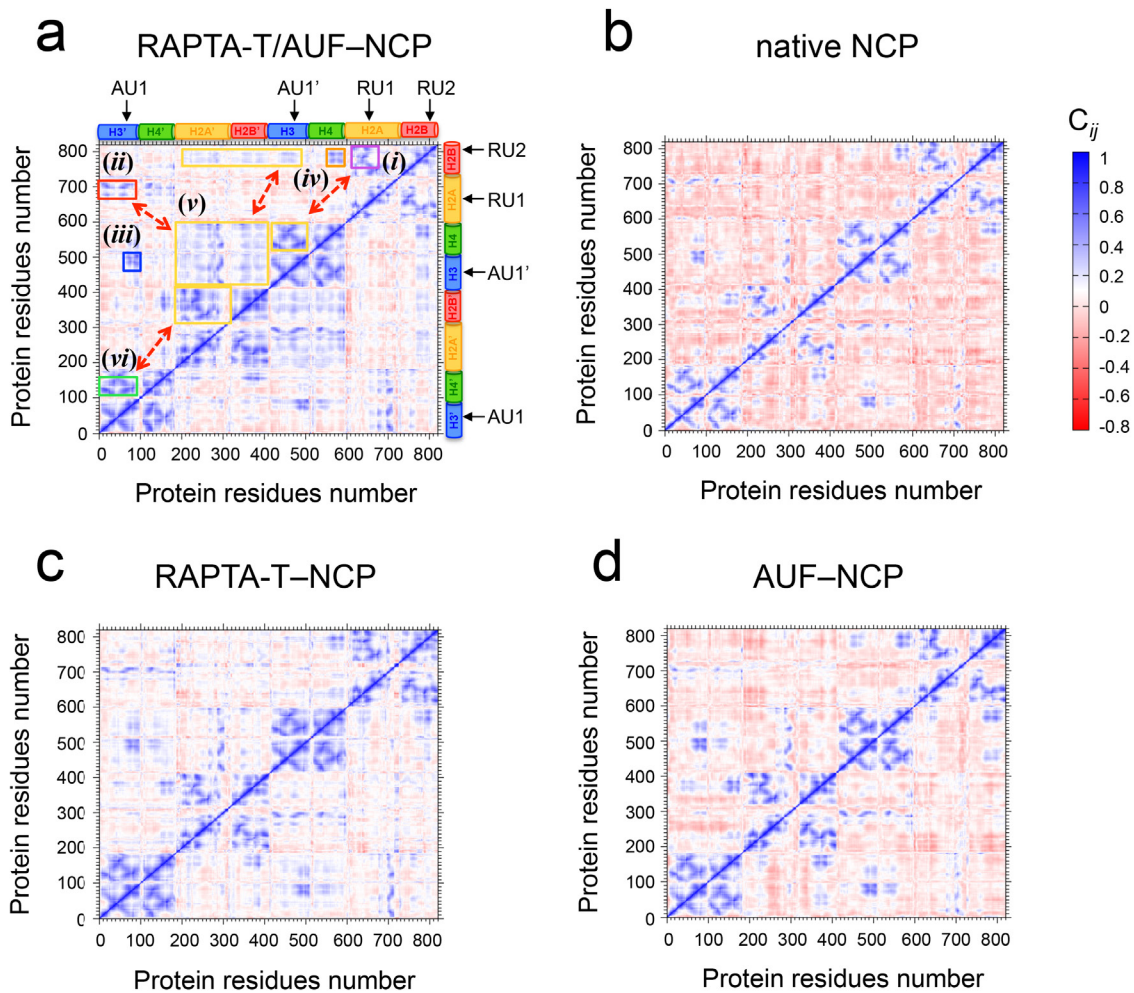

**Supplementary Figure 8.** Cross-correlation matrices of the fluctuations of the  $C_{\alpha}$  atoms ( $C_{ij}$ ) around their mean positions, calculated for the last  $\sim 200$  ns of MD simulations of the RAPTA-T/AUF–NCP (**a**), NCP (**b**), RAPTA-T–NCP (**c**), and AUF–NCP (**d**) systems. The extent of correlated ( $0 > C_{ij} < 1$ ) and anticorrelated ( $-1 > C_{ij} < 0$ ) motions is color-coded according to the scale on the right. On the  $C_{ij}$  plot of the RAPTA-T/AUF–NCP system (**a**), RAPTA-T and AUF sites are indicated, as well as the H2A, H2B, H3 and H4 histones. Regions indicating highly correlated motions are highlighted with boxes ( $i$ – $vi$ ). Full details are reported in the main text.



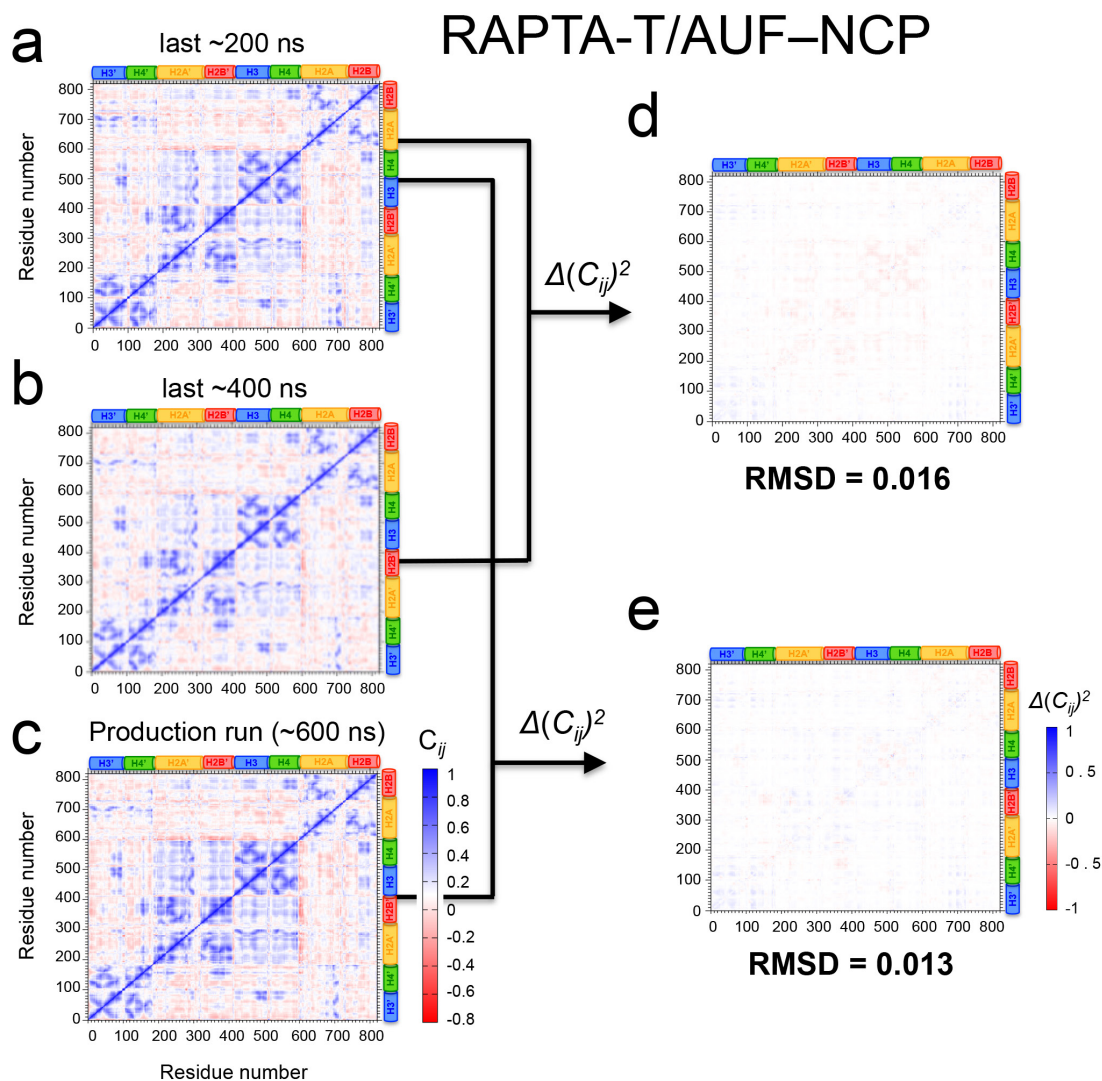

| RMSD                     | native NCP | RAPTA-T-NCP | AUF-NCP | RAPTA-T/<br>AUF-NCP | One RAPTA-T |
|--------------------------|------------|-------------|---------|---------------------|-------------|
| last 200ns – last 400 ns | 0.018      | 0.015       | 0.012   | 0.016               | 0.017       |
| last 200ns – 600 ns      | 0.015      | 0.017       | 0.015   | 0.013               | 0.018       |

**Supplementary Figure 9.** Cross-correlation matrices ( $C_{ij}$ ) of the RAPTA-T/AUF-NCP system, calculated over three different time windows, considering the last ~200 ns of MD (**a**), the last ~400 ns of MD (**b**), as well as the entire production run, consisting of ~600 ns of MD (**c**). The difference matrix  $\Delta(C_{ij})^2$  between the square of the  $C_{ij}$  matrix elements in (**a**) and (**b**) is given in (**d**), while the  $\Delta(C_{ij})^2$  matrix between the square of the  $C_{ij}$  matrices in (**a**) and (**c**) is given in (**e**). The differential maps (**d,e**) show only small and homogeneous changes of the correlation coefficients, with an

overall RMSD of 0.016 **(d)** and 0.013 **(e)**. The bottom table reports the RMSD for the differential maps calculated between different time windows (i.e., *(i)* last 200 ns – last 400 ns; *(ii)* last 200 ns – last 400 ns) of the native NCP, RAPTA-T–NCP, AUF–NCP, RAPTA-T/AUF–NCP systems and of the RAPTA-T/AUF–NCP system with only one RAPTA-T adduct at site RU1 (“One RAPTA-T”).



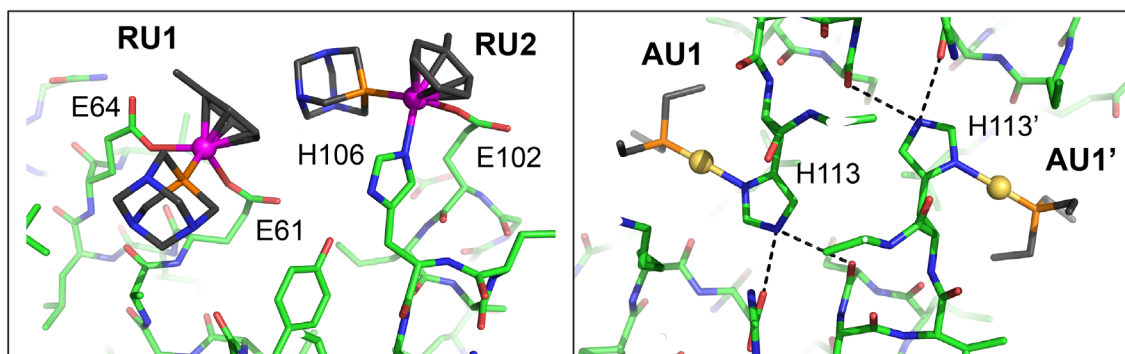

Correlation coefficients ( $C_{ij}$ ) for the C $\alpha$  atoms of the residues that bind RAPTA-T and AUF

| Site     | $i - j$ (C $\alpha$ ) | NCP   | AUF-NCP | RAPTA-T-NCP | RAPTA-T/AUF-NCP | One RAPTA-T |
|----------|-----------------------|-------|---------|-------------|-----------------|-------------|
| RU1-RU1  | E64 – E61             | 0.80  | 0.82    | 0.86        | 0.88            | 0.82        |
| RU2-RU2  | H106 – E102           | 0.78  | 0.78    | 0.88        | 0.86            | 0.80        |
| RU1-RU2  | E64 – H106            | 0.76  | 0.72    | 0.76        | 0.76            | 0.81        |
| RU1-RU2  | E64 – E102            | 0.76  | 0.71    | 0.82        | 0.81            | 0.72        |
| RU1-RU2  | E61 – H106            | 0.68  | 0.79    | 0.85        | 0.82            | 0.76        |
| RU1-RU2  | E61 – E102            | 0.73  | 0.75    | 0.78        | 0.75            | 0.76        |
| RU1-AU1  | E64 – H113            | -0.58 | -0.61   | 0.44        | 0.61            | 0.58        |
| RU1-AU1  | E61 – H113            | -0.69 | -0.52   | 0.45        | 0.68            | 0.68        |
| RU1-AU1' | E64 – H113'           | -0.72 | -0.54   | 0.36        | 0.34            | 0.28        |
| RU1-AU1' | E61 – H113'           | -0.61 | -0.58   | 0.38        | 0.39            | 0.36        |
| RU2-AU1  | H106 – H113           | -0.68 | -0.62   | 0.36        | 0.38            | 0.30        |
| RU2-AU1  | E102 – H113           | -0.72 | -0.6    | 0.35        | 0.42            | 0.38        |
| RU2-AU1' | H106 – H113'          | 0.32  | 0.26    | 0.38        | 0.52            | 0.42        |
| RU2-AU1' | E102 – H113'          | 0.24  | 0.21    | 0.34        | 0.46            | 0.46        |
| AU1-AU1' | H113 – H113'          | -0.54 | -0.46   | 0.48        | 0.52            | 0.47        |

Correlation coefficients ( $C_{ij}$ ) for the Ru-Au atoms

| $i - j$ (Ru-Au) | RAPTA-T/AUF-NCP | One RAPTA-T |
|-----------------|-----------------|-------------|
| RU1-RU2         | 0.87            | –           |
| RU1-AU1         | 0.61            | 0.58        |
| RU1-AU1'        | 0.38            | 0.38        |
| RU2-AU1         | 0.46            | –           |
| RU2-AU1'        | 0.48            | –           |
| AU1-AU1'        | 0.50            | 0.48        |

**Supplementary Figure 10.** Correlation coefficients, extracted from the cross-correlation matrices, for the C $\alpha$  atoms of the residues that bind RAPTA-T and AUF, reported for all of the simulated systems (large table). For the RAPTA-T/AUF-NCP system, correlation coefficients for the ruthenium and gold atoms are also reported (small table at bottom). The structural image at top provides an overview of the RU1/RU2 and AU1/AU1' sites.

**a Path A**

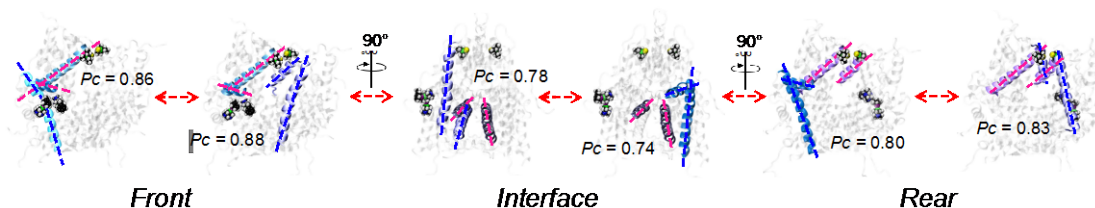

**b Path B**

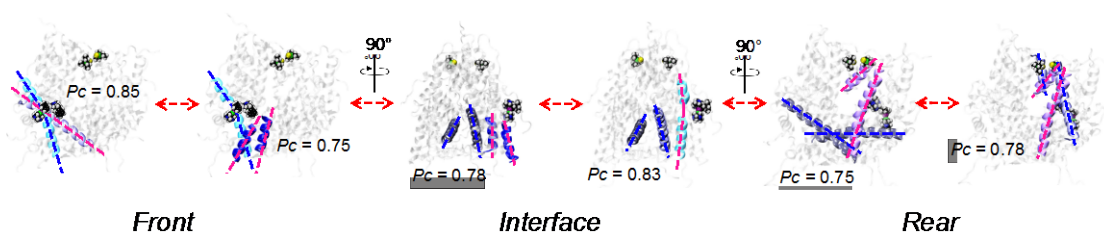

**Supplementary Figure 11.** Graphical representation of a Pearson correlation coefficient ( $P_c$ ) analysis used to compute the strength of the coupling between the  $\alpha$ -helices of the histone components of the RAPTA-T/AUF–NCP system. The highest  $P_c$  values calculated between pairs of angles formed by the histone  $\alpha$ -helices are reported, revealing two correlation paths, *Path A* (**a**) and *Path B* (**b**) that connect the kink of the H2A histone, occurring at the RU sites, with the AUF sites at both front (AU1) and rear (AU1') of the structure. The histone proteins are shown as ribbons. Blue and magenta dashed lines are used to indicate the correlating angles. The structure is rotated of 90° along its main axis, showing the front (left), interface (central panel) and rear (right) sides of the NCP.

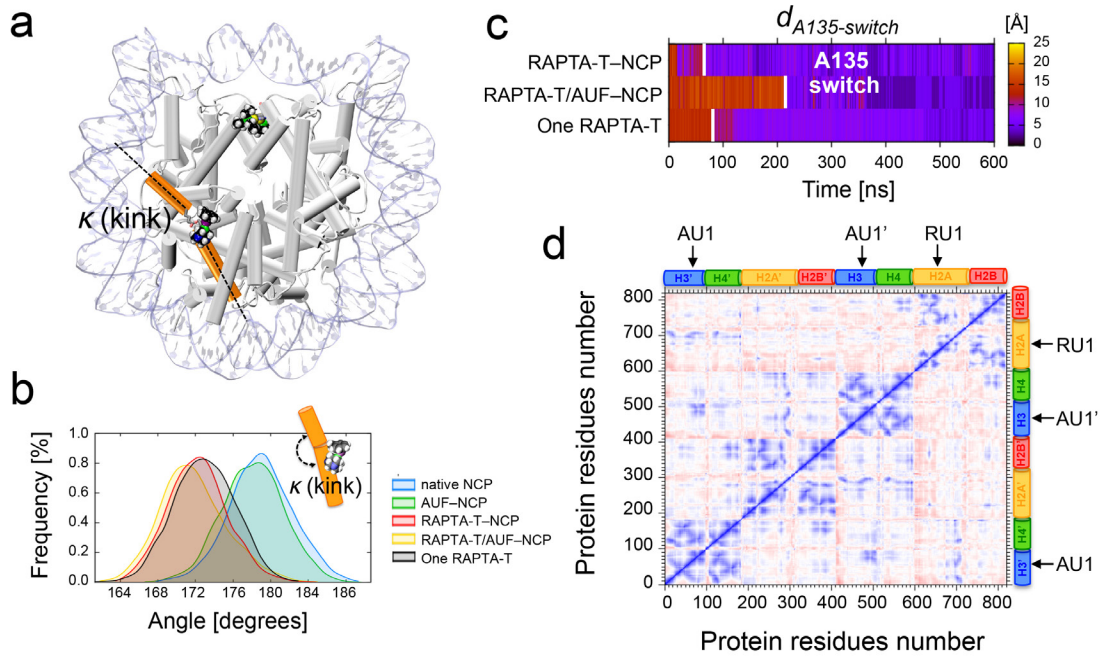

**Supplementary Figure 12.** Key properties of the RAPTA-T/AUF-NCP system simulated with only a single RAPTA-T adduct at the RU1 site. **(a)** Overview of the simulated system, highlighting the kink angle ( $\kappa$ ) within the long  $\alpha$ -helix of H2A. **(b)** Probability distribution functions of the kink angle ( $\kappa$ ), as calculated during the production runs of the native NCP (blue), AUF-NCP (green), RAPTA-T-NCP (red), RAPTA-T/AUF-NCP (yellow) and RAPTA-T/AUF-NCP having only one RAPTA-T adduct (black) systems. **(c)** Time evolution along MD of the RAPTA-T-NCP, RAPTA-T/AUF-NCP and RAPTA-T/AUF-NCP with only one RAPTA-T adduct systems for the distance ( $d_{A135-switch}$ ) between the  $C\alpha$  atom of H3 A135 and the center of mass (COM) of the H4 N64 and H4 R67 residues, color-coded according to the scale on the right. **(d)** Cross-correlation matrix of the fluctuations of the  $C\alpha$  atoms ( $C_{ij}$ ) around their mean positions, calculated over the equilibrium MD trajectory of the RAPTA-T/AUF-NCP with a single RAPTA-T adduct system.

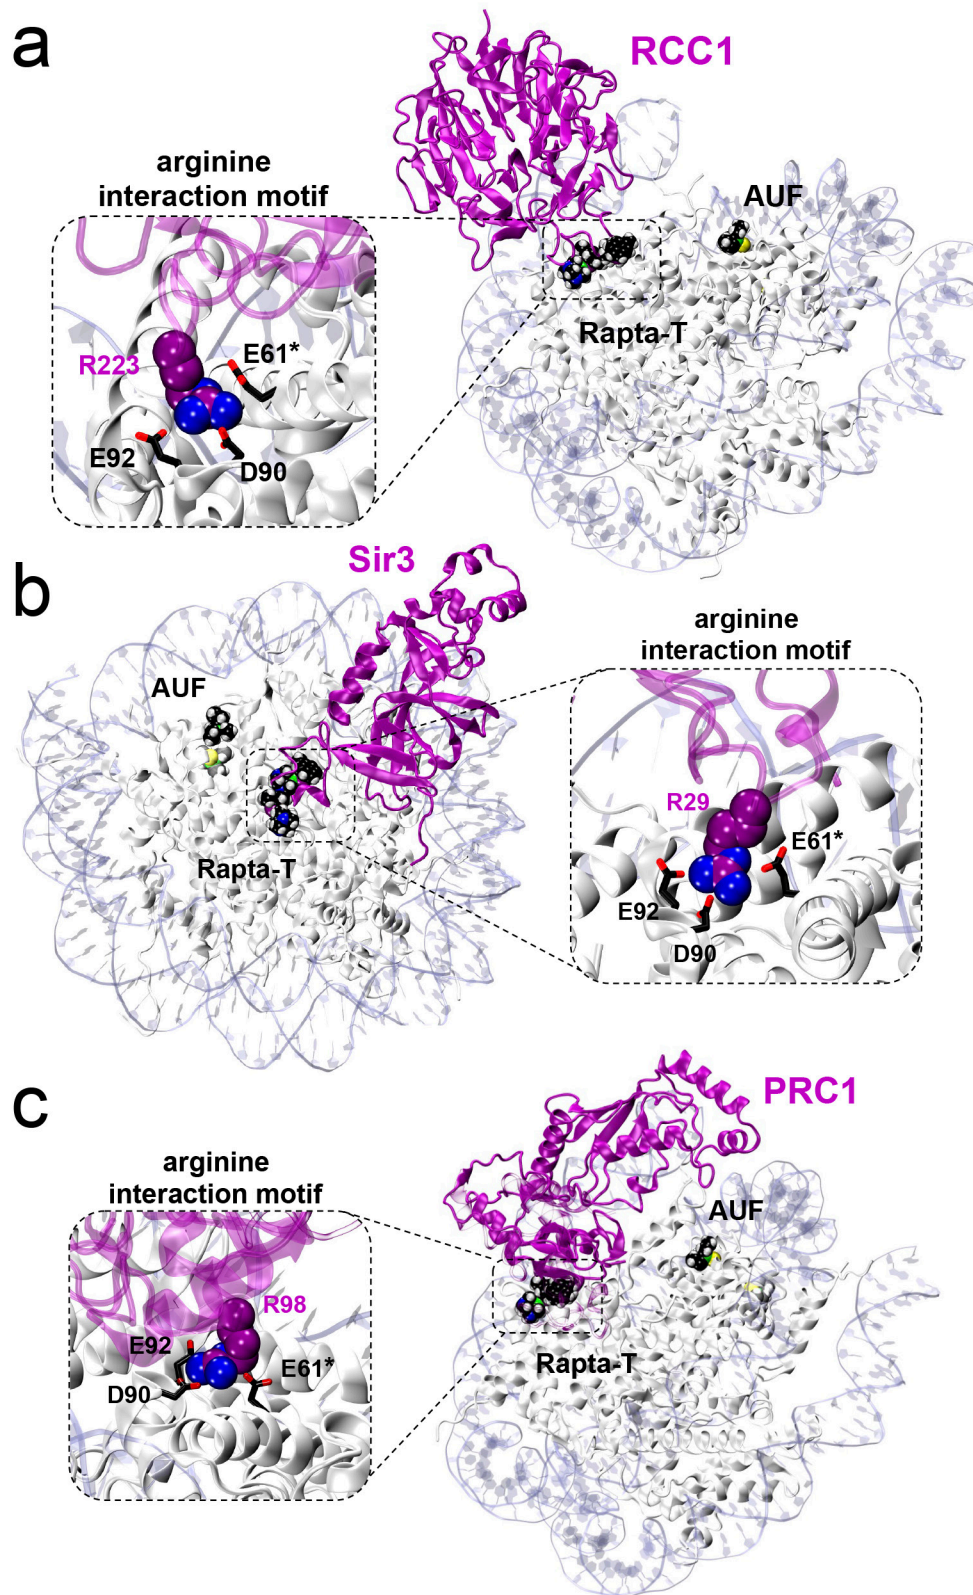

**Supplementary Figure 13.** (a-c) NCP-on-NCP superpositions of the RAPTA-T/AUF-NCP crystal structure with those of either the RCC1<sup>2</sup> (a), silent information regulator 3 (Sir3; b)<sup>3</sup> or PRC1<sup>4</sup> (c) chromatin proteins bound to the NCP (the NCP and

the second chromatin factor molecule associated with the other nucleosome face in the assembly are omitted for clarity). RAPTA-T is seen to overlap with the arginine interaction motif of chromatin factors, suggesting potential for direct (steric) interference with binding of such chromatin factors. For each system, a close-up view of the arginine interaction motif is provided, highlighting the interaction of a key arginine residue with the nucleosome core acidic patch E61, D90, and E92 residues. An asterisk indicates the E61 residue that is engaged in ruthenium ion coordination of RAPTA-T (RU1 site). Chromatin factors (magenta) are shown as ribbons and RAPTA-T, AUF as well as the key arginine residue of chromatin factors are given in space-filling representation.



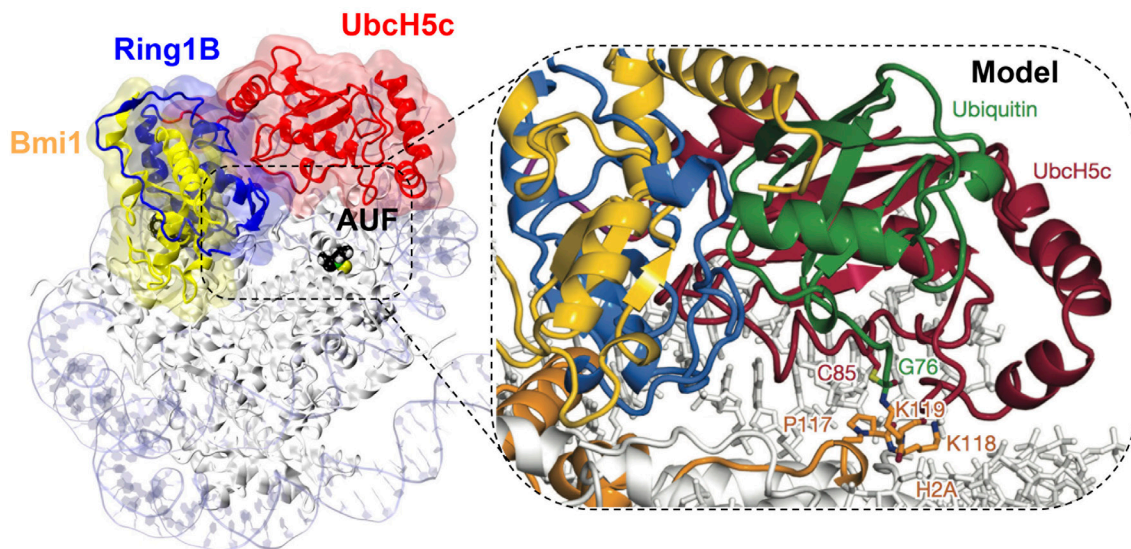

**Supplementary Figure 14.** NCP-on-NCP superposition of the RAPTA-T/AUF–NCP crystal structure with that of the PRC1 chromatin factor bound to the NCP<sup>4</sup> (the NCP and the second chromatin factor molecule associated with the other nucleosome face in the assembly are omitted for clarity). PRC1 is comprised of the E3 ligase, which is composed of two subunits (Bmi1 and Ring1B, shown in yellow and blue ribbons, respectively) and by the E2 enzyme (Ubch5c, red), which ubiquitylates Lys119 at the H2A C-terminus. AUF is shown in space-filling representation. A close-up view around the AU1 site is given at the right, showing a model for ubiquitin binding in the nucleosome core proposed by McGinty et al<sup>4</sup>, which suggests the potential for interference by AUF adducts. Ubiquitin is shown with green ribbons, while the PRC1 ubiquitylation factor is color coded as in the main panel.

## SUPPLEMENTARY REFERENCES

1. Collu, F., Vargiu, A., Dreier, J., Cascella, M. & Ruggerone P. Recognition of imipenem and meropenem by the RND-transporter MexB studied by computer simulations. *J. Am. Chem. Soc.* 134, 19146-19158 (2012).
2. Makde R. D., England J. R., Yennawar H. P. & Tan S. Structure of RCC1 chromatin factor bound to the nucleosome core particle. *Nature* **467**, 562-566 (2010).
3. Armache K. J., Garlick J. D., Canzio D., Narlikar G. J., Kingston R. E. Structural basis of silencing: Sir3 BAH domain in complex with a nucleosome at 3.0 Å resolution. *Science* **334**, 977-982 (2011).
4. McGinty, R. K., Henrici, R. C. & Tan, S. Crystal structure of the PRC1 ubiquitylation module bound to the nucleosome *Nature* **514**, 591-596 (2014).
